# Supplementary material for: Dehydration of Isopropanol over Silica-Supported Heteropoly Acids
Source: MDPI journal article supplement (doi:10.3390/catal14010051), 2024-01-11
Supplement: s1 [file s1]

# Dehydration of Isopropanol over Silica-Supported Heteropoly Acids

Amal Alasmari <sup>1,2</sup>, Elena F. Kozhevnikova <sup>1</sup> and Ivan V. Kozhevnikov <sup>1,\*</sup>

<sup>1</sup> Department of Chemistry, University of Liverpool, Liverpool L69 7ZD, UK;  
a.a.alasmari@liverpool.ac.uk or ahassaan@kku.edu.sa (A.A.); efkozhev@liverpool.ac.uk (E.F.K.)

<sup>2</sup> Department of Chemistry, King Khalid University, Abha 61413, Saudi Arabia

\* Correspondence: kozhev@liverpool.ac.uk; Tel.: +44-151-794-2938

## Supplementary Materials

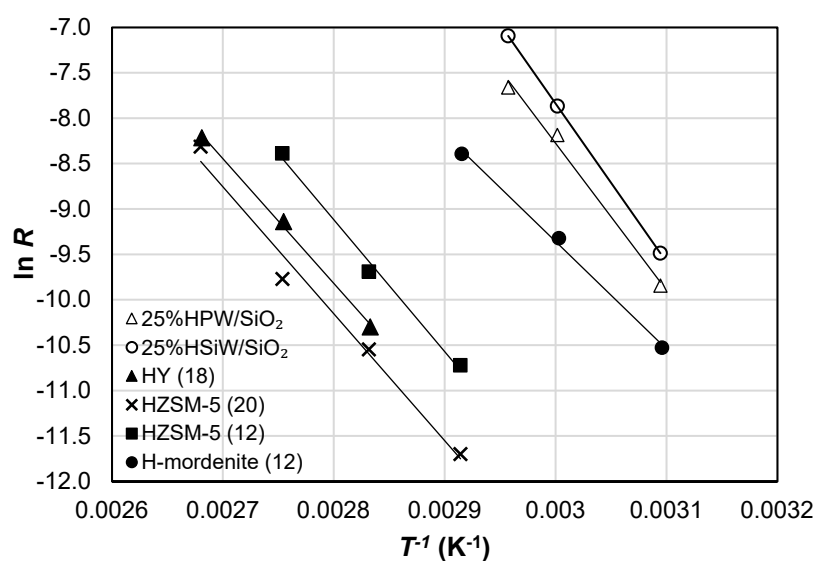

**Figure S1.** Arrhenius plots for i-PrOH dehydration over zeolites and 25%HPA/SiO<sub>2</sub> catalysts (rate  $R$  in mol g<sup>-1</sup>h<sup>-1</sup>, 50–100 °C temperature range, 0.20 g catalyst, 0.95 kPa i-PrOH partial pressure,  $W/F = 422$  g h<sup>-1</sup>mol<sup>-1</sup> for zeolites and 281 g h<sup>-1</sup>mol<sup>-1</sup> for 25%HPA/SiO<sub>2</sub>).

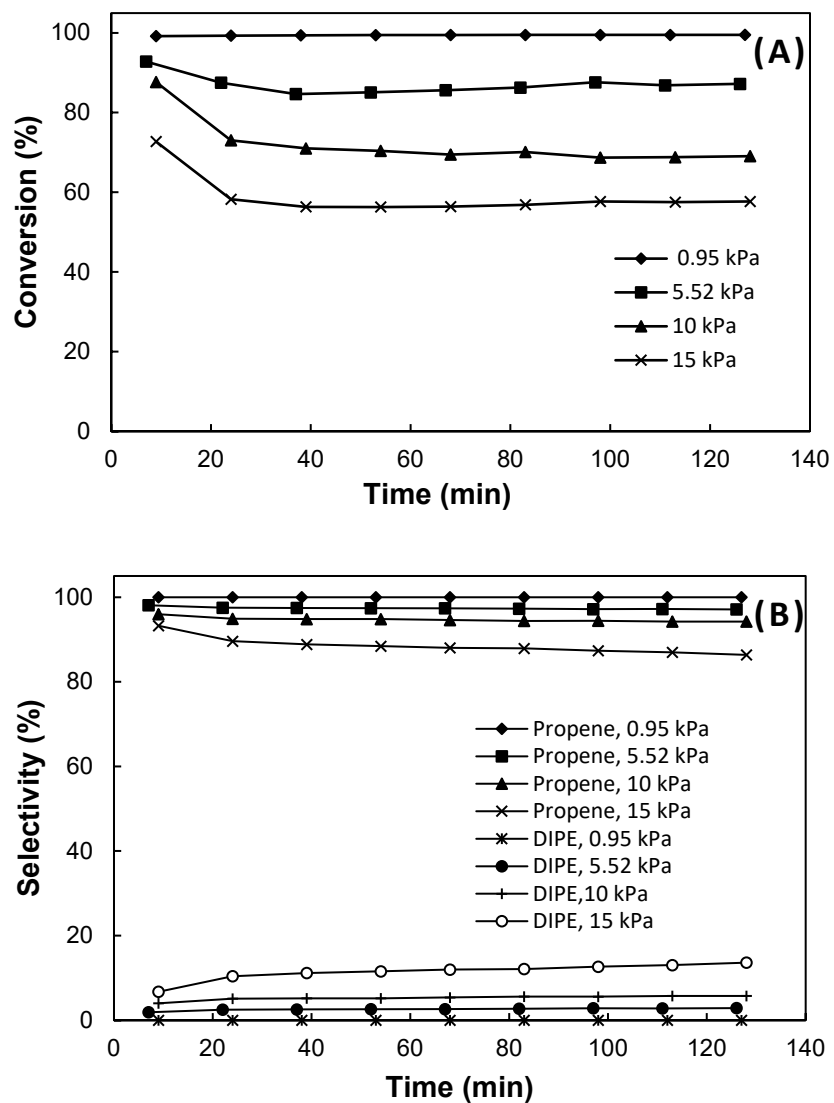

**Figure S2.** Effect of i-PrOH partial pressure on (A) i-PrOH conversion and (B) product selectivity over 25%HPW/SiO<sub>2</sub> catalyst (0.20 g) at 100 °C, 20 ml min<sup>-1</sup> N<sub>2</sub> flow rate.

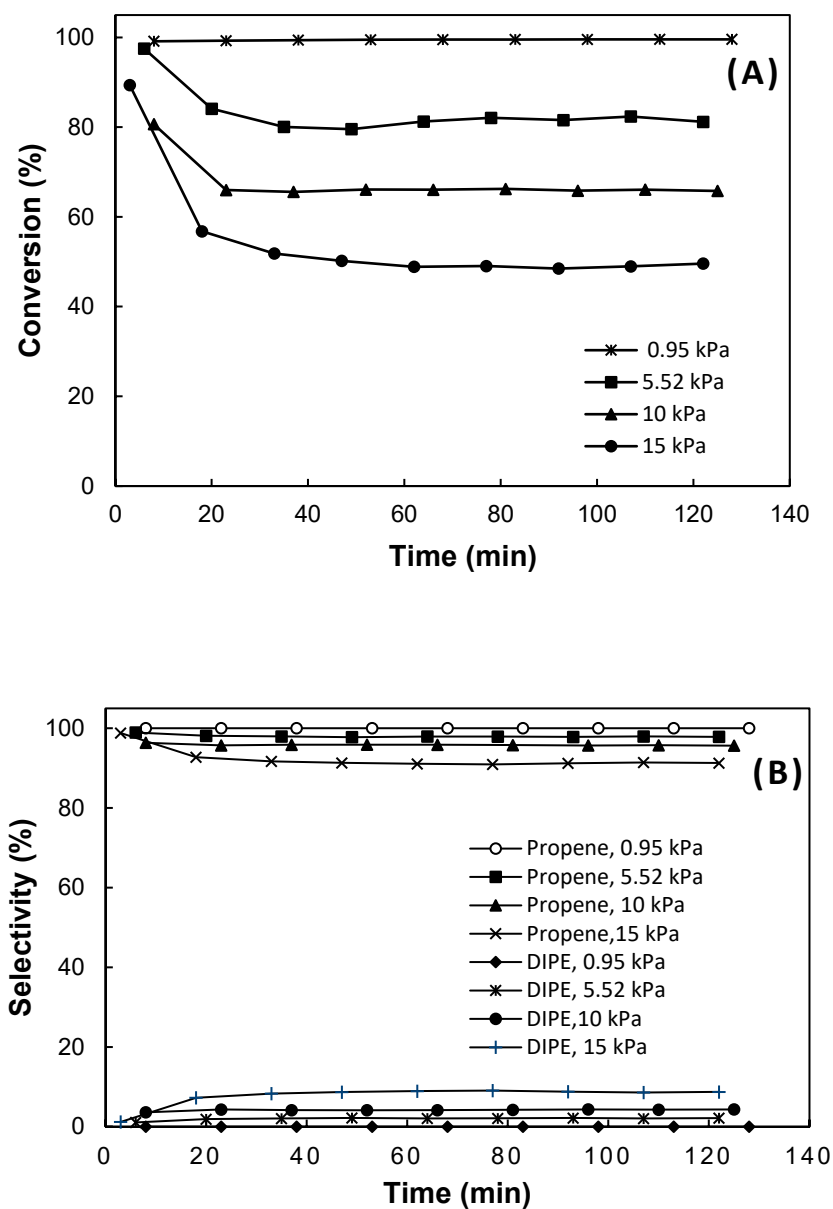

**Figure S3.** Effect of i-PrOH partial pressure on (A) i-PrOH conversion and (B) product selectivity over 25%HSiW/SiO<sub>2</sub> catalyst (0.20 g) at 100 °C, 20 ml min<sup>-1</sup> N<sub>2</sub> flow rate.

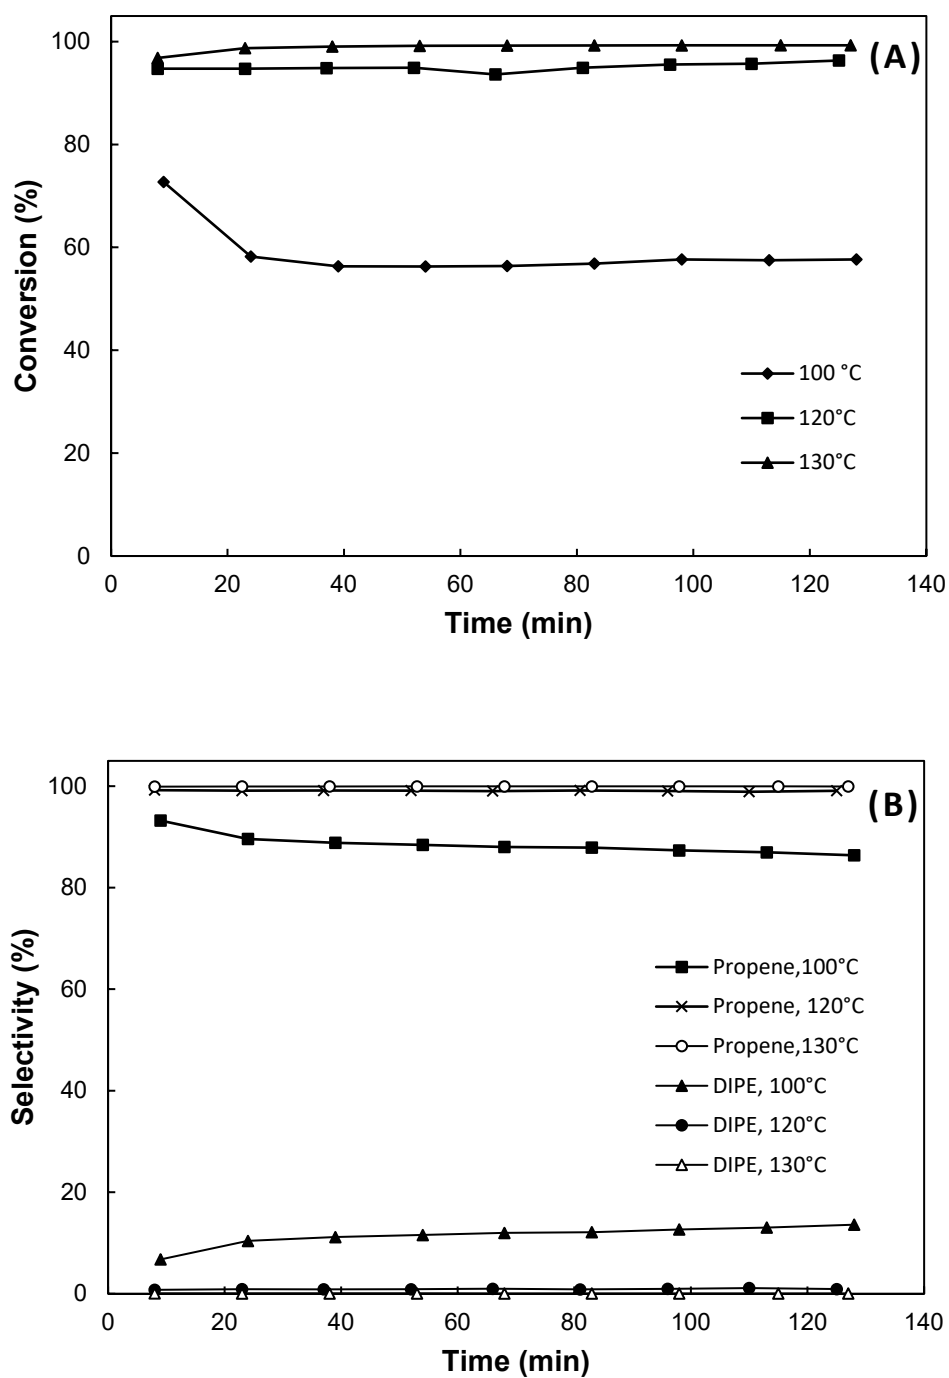

**Figure S4.** Effect of temperature on i-PrOH conversion (A) and product selectivity (B) over 25%HPW/SiO<sub>2</sub> catalyst (0.20 g) at 15 kPa i-PrOH partial pressure, 20 mL min<sup>-1</sup> N<sub>2</sub> flow rate, contact time W/F = 27 g h mol<sup>-1</sup>.
